# Supplementary material for: A novel high-flux asymmetric p(VDF–HFP) membrane with a dense skin for ethanol pervaporation
Source: Royal Society of Chemistry journal article supplement (doi:10.1039/c3ra45915b), 2014-01-01

Fig. 1 SEM images of membranes: (a) using water as coagulation bath, exposure time 0 s; (b) using water as coagulation bath, exposure time 30 s; (c) using water as coagulation bath, exposure time 60 s and (e) its cross-section view ; (d) using water as coagulation bath, exposure time 120 s; (f) using 20% EtOH aqueous solution as coagulation bath, exposure time 60 s and (g) its cross-section view; (h) cross-section view of first using 20% EtOH aqueous solution then using water as coagulation bath, exposure time 60 s and (i) its magnified view.

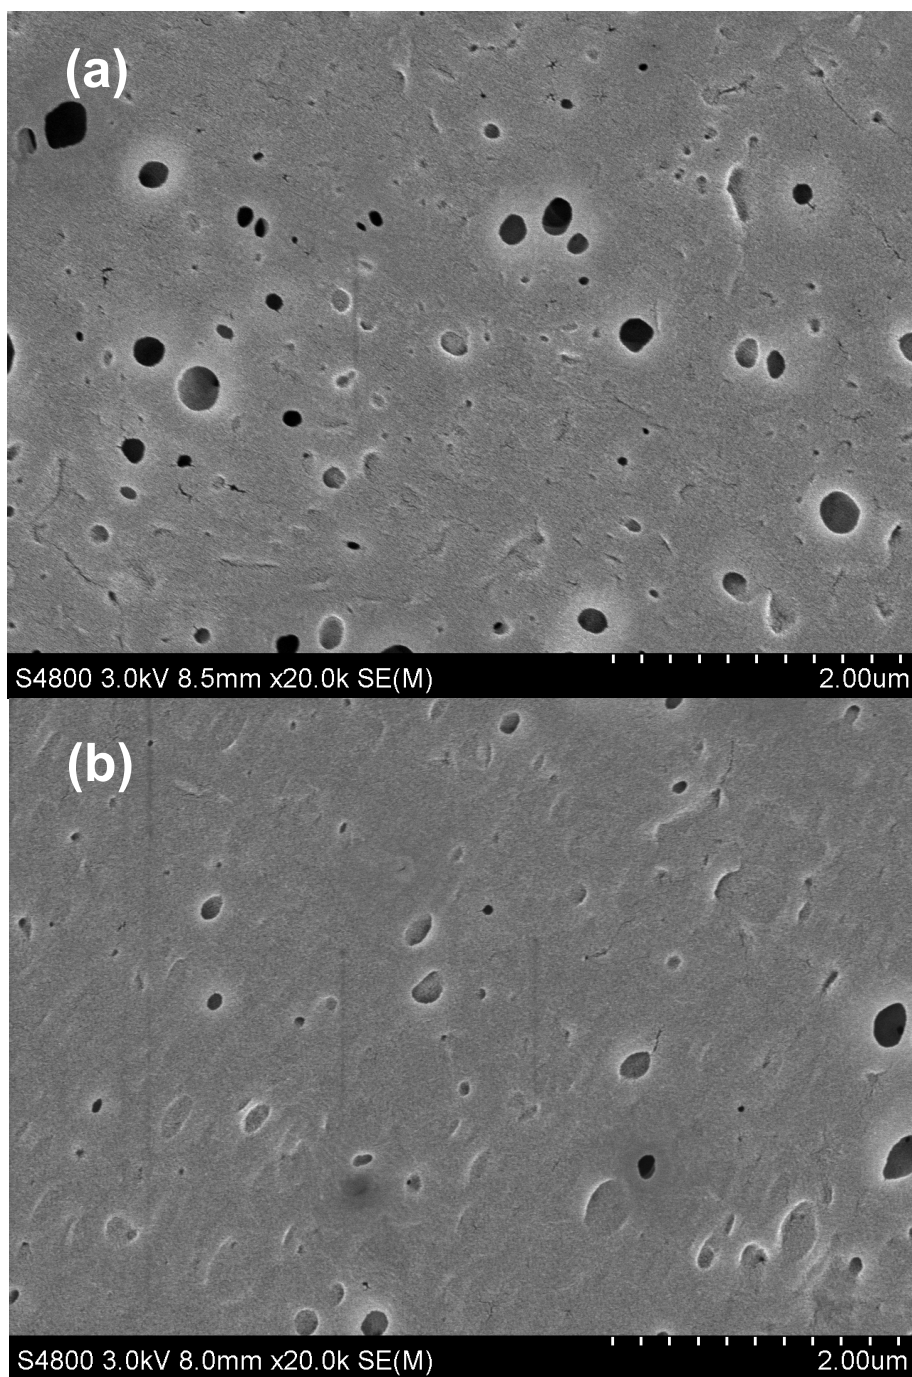

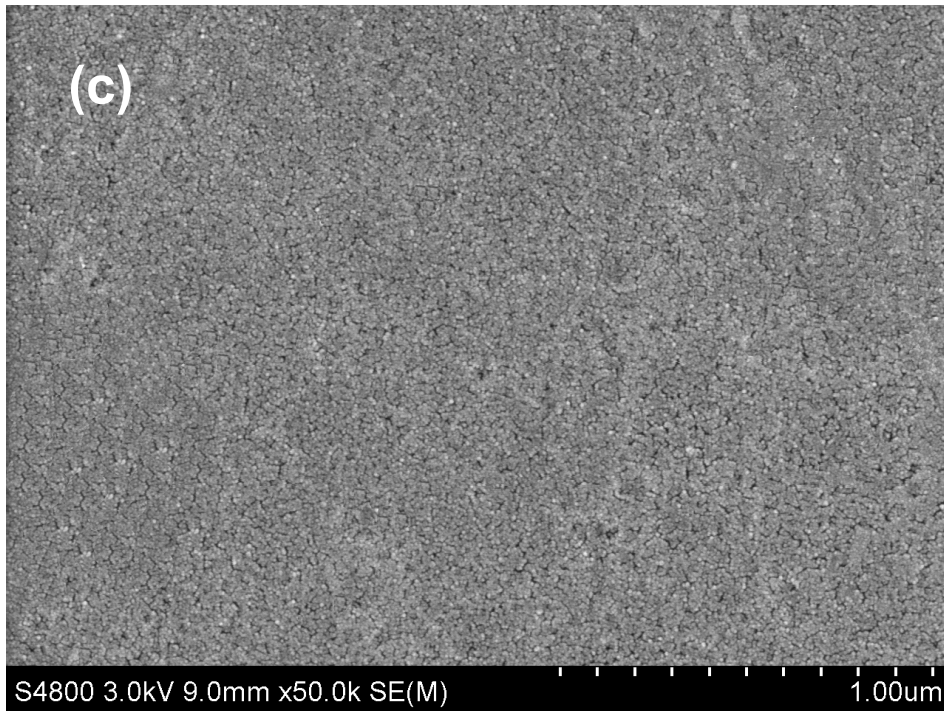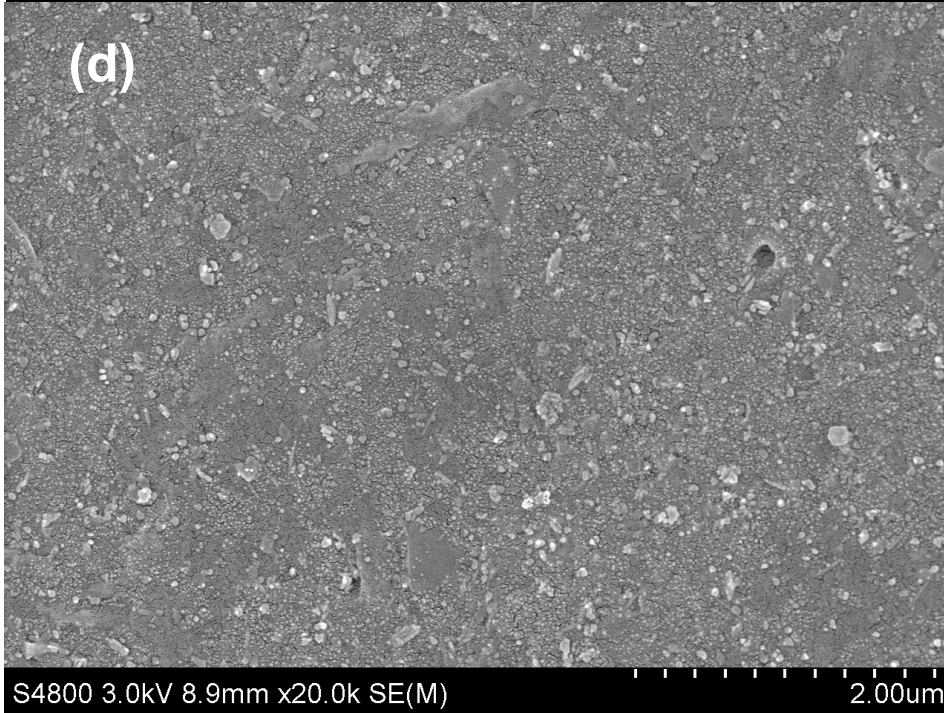

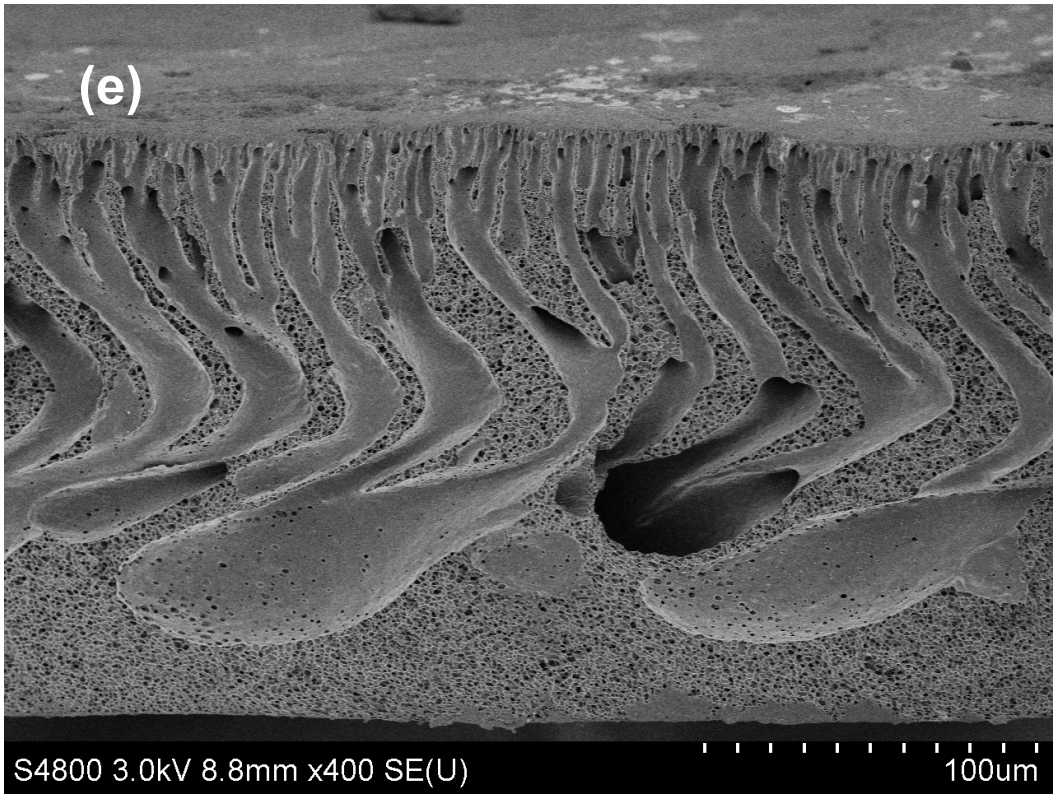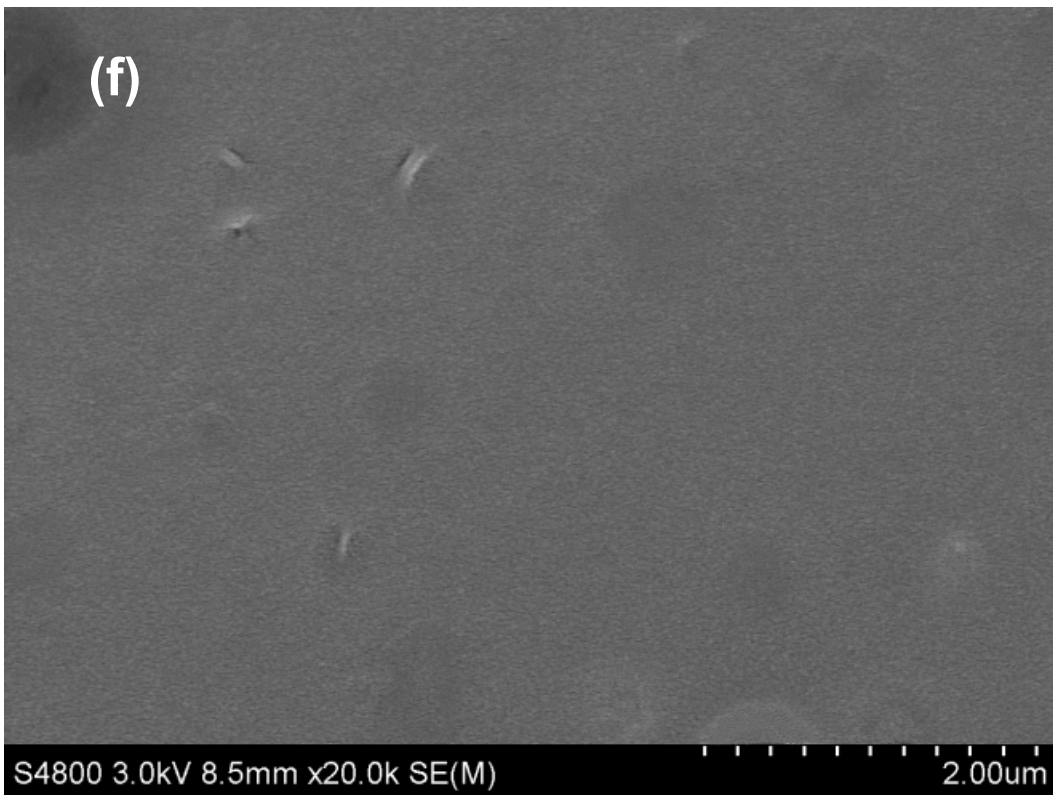

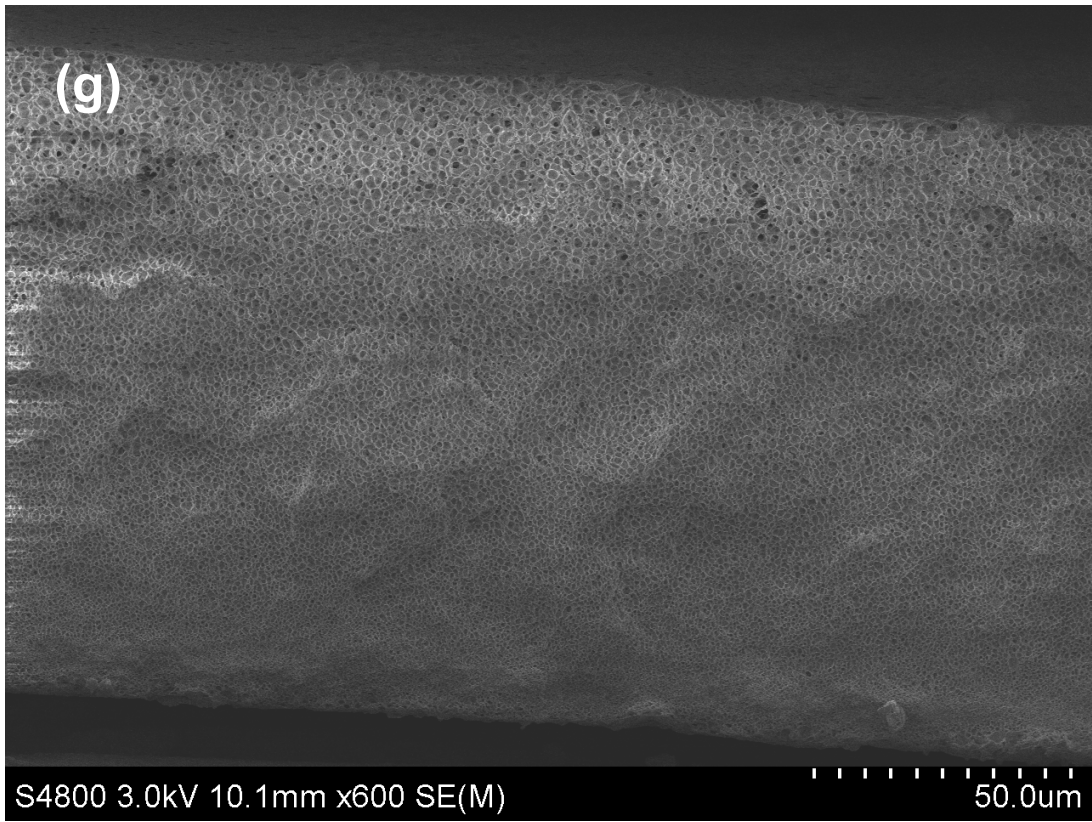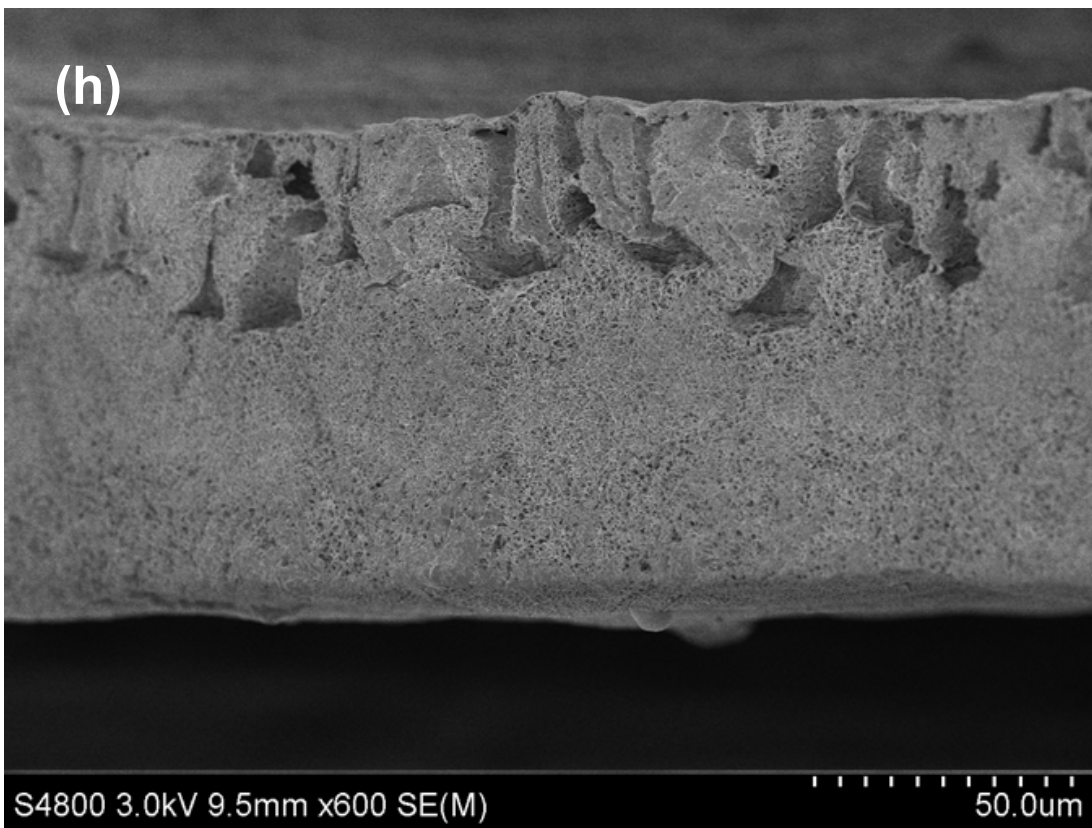

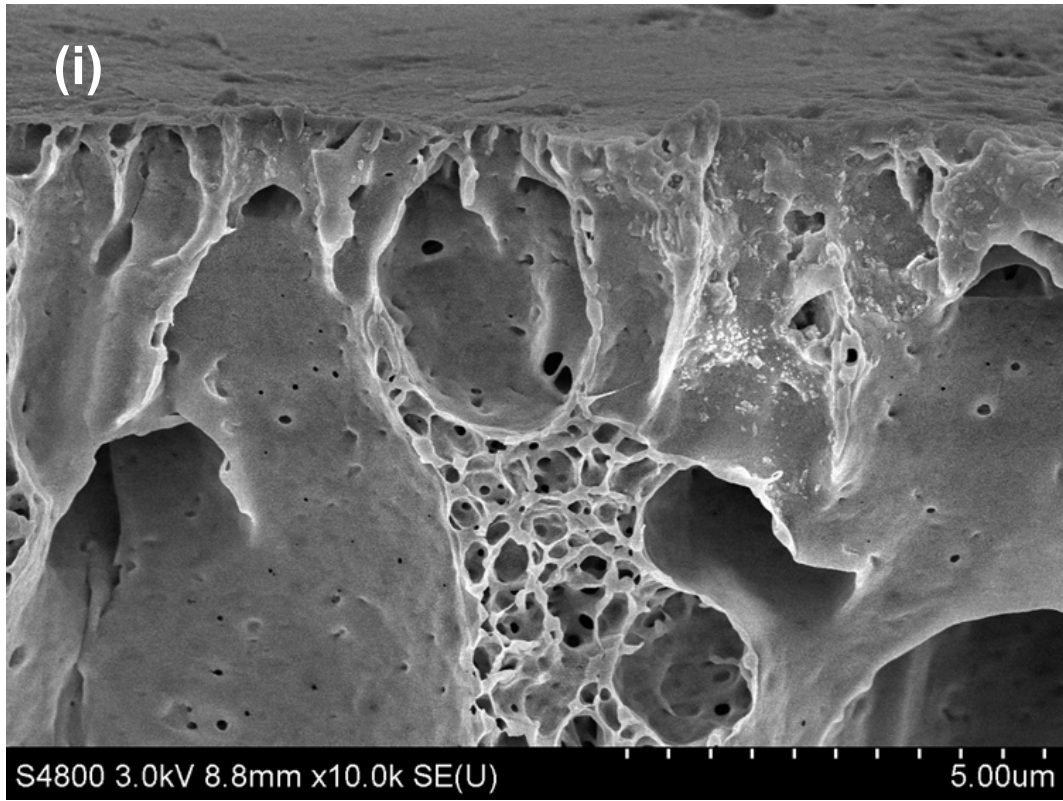

Supplement: c3ra45915b1.pdf [file c3ra45915b1.pdf]
